# Supplementary material
Source: ML conference proceedings conference paper supplement (https://openaccess.thecvf.com/content/CVPR_2019/html/Sun_Leveraging_Crowdsourced_GPS_CVPR_2019_paper.html)
Supplement: Supplementary file 1 [file Sun_Leveraging_Crowdsourced_GPS_CVPR_2019_supplemental.pdf]

Archive with 3 entries (2 files):
- supplement_reduce_size.pdf
- __MACOSX/
- __MACOSX/._supplement_reduce_size.pdf
