# Supplementary material
Source: ML conference proceedings conference paper supplement (https://openaccess.thecvf.com/content/CVPR_2019/html/Sun_Leveraging_Crowdsourced_GPS_CVPR_2019_paper.html)
Supplement: Supplementary file 1 [file Sun_Leveraging_Crowdsourced_GPS_CVPR_2019_supplemental.pdf › supplement_reduce_size.pdf]

# Supplementary Material

Submission #4018

## 1 More samples of our dataset

Following figures (1-3) show samples from our datasets with manually labeled masks. To present GPS samples more clearly, they are rendered as small red dots over black-white aerial images.

### 1.1 Beijing dataset

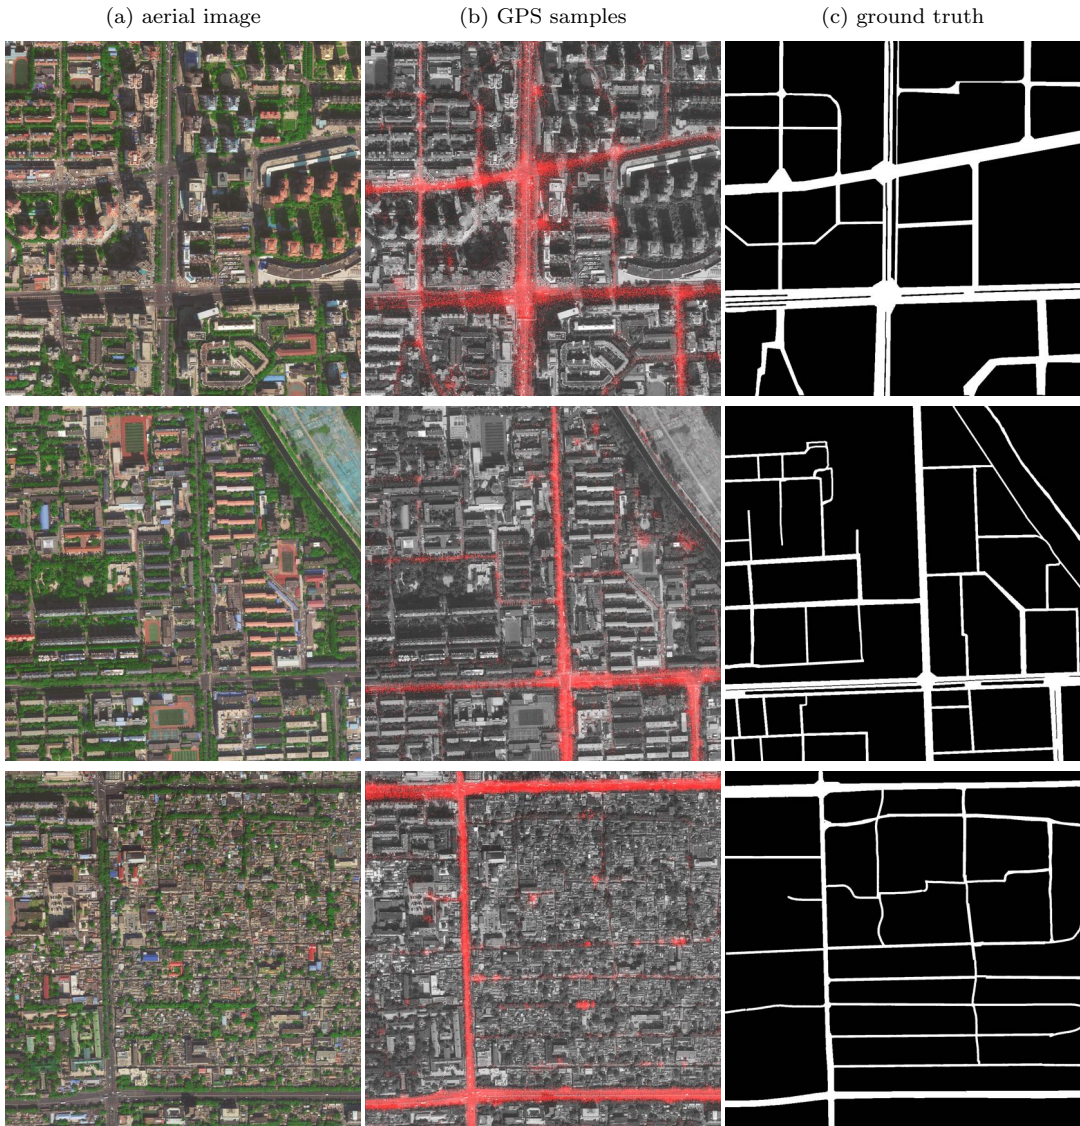

Figure 1: Beijing dataset

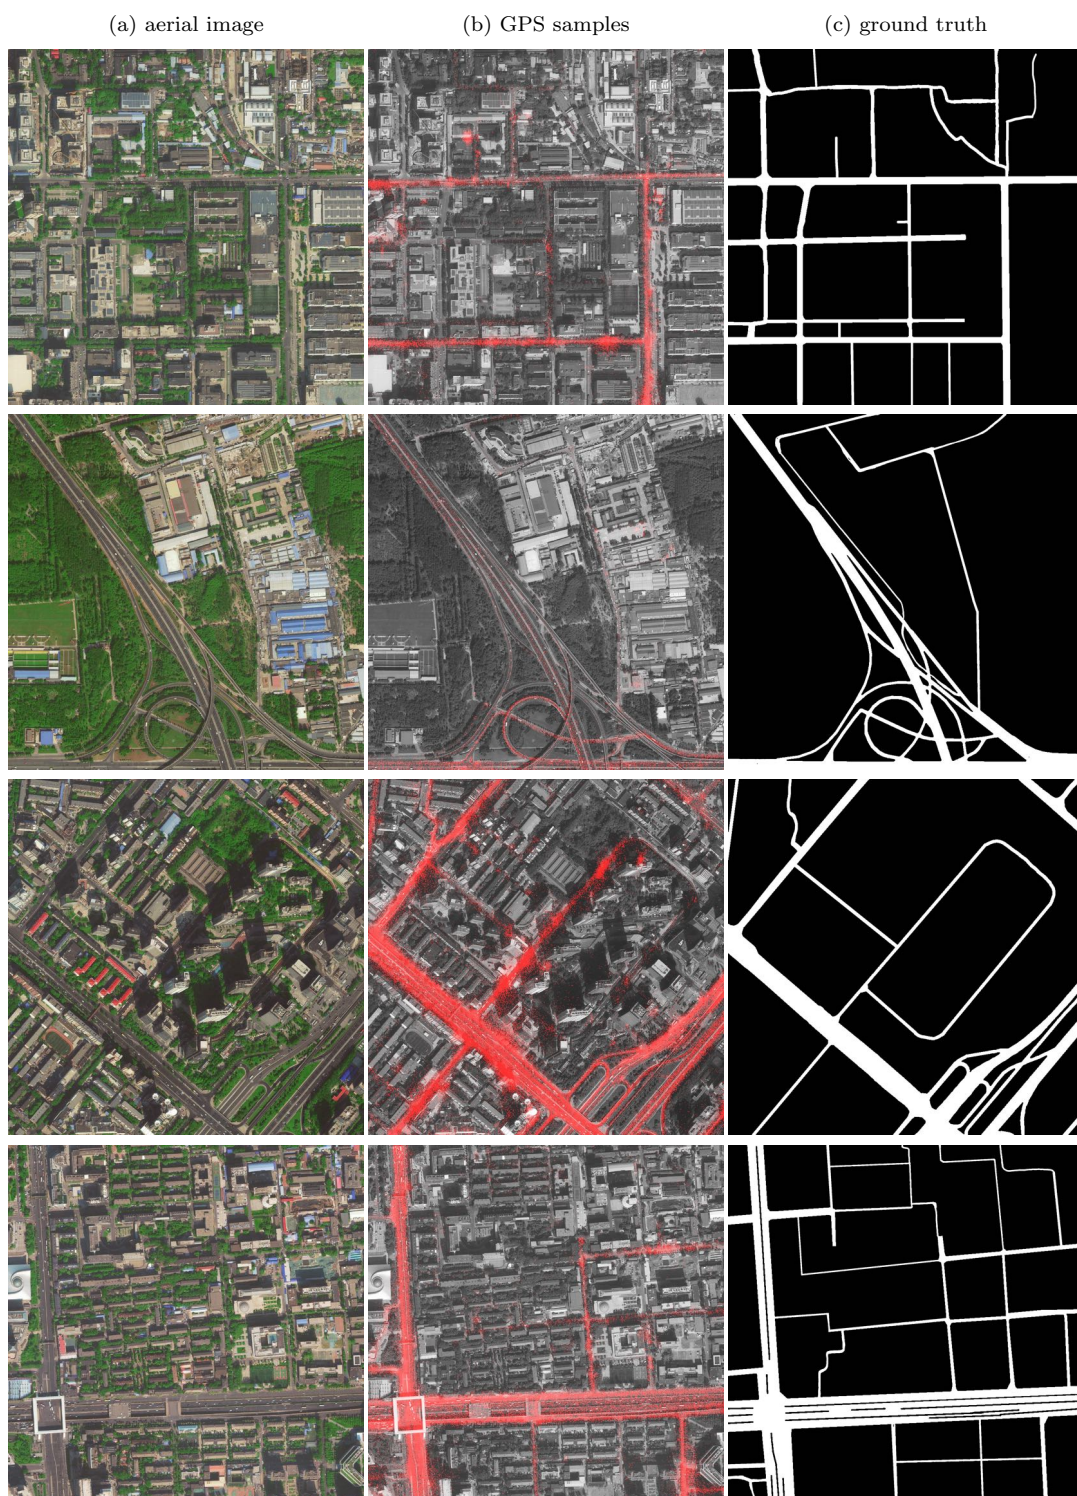

Figure 2: Beijing dataset (cont.)

## 1.2 Shanghai dataset

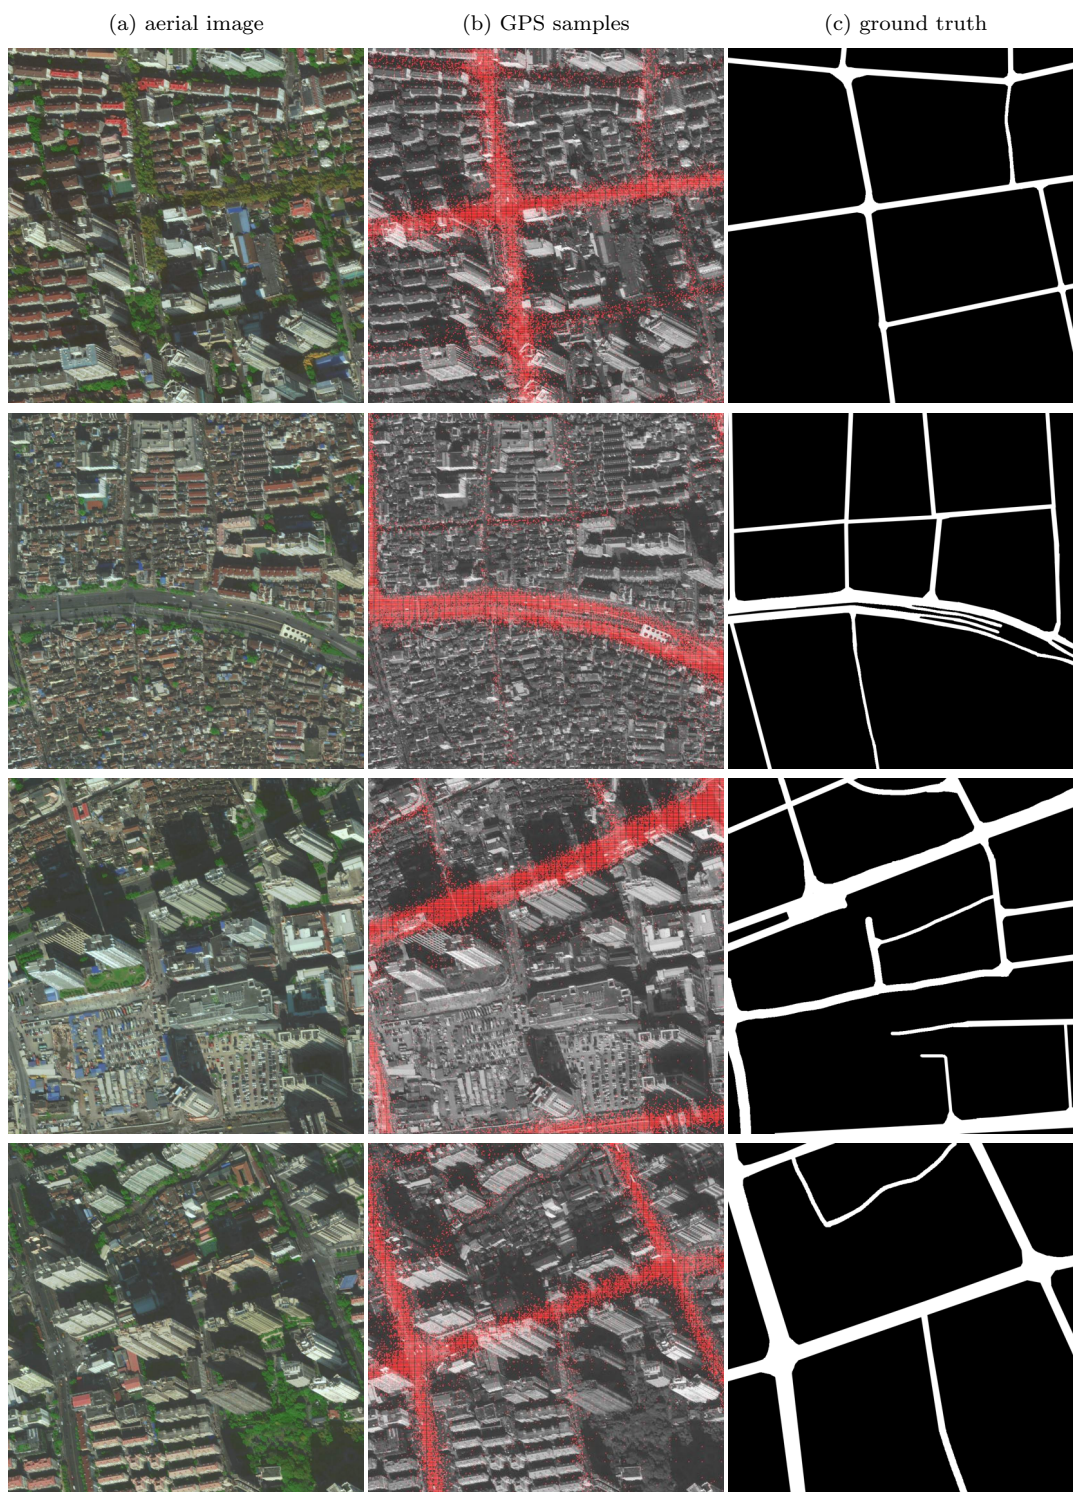

Figure 3: Shanghai dataset

There are a few vertical and horizon lines in Fig. 3(b) that no GPS samples lie on. This is caused by the lower resolution of GPS samples in Shanghai dataset.
